# Supplementary material for: Comprehensive assessment of circulating immune cell populations in response to stereotactic body radiation therapy in patients with liver cancer
Source: PubMed Central journal article supplement — Adv Radiat Oncol. 2017 Aug 18;2(4):540–7. doi: 10.1016/j.adro.2017.08.003 (PMC5707422; doi:10.1016/j.adro.2017.08.003), 2017-08-18
Supplement: mmc2.pdf [file mmc2.pdf]

| Protocol                         | Phenotype                           | Measurement              | Protocol                                              | Phenotype                                   | Measurement                   |                                            |                 |
|----------------------------------|-------------------------------------|--------------------------|-------------------------------------------------------|---------------------------------------------|-------------------------------|--------------------------------------------|-----------------|
| TBNK/M/G                         | Granulocytes (CD15+SSChi)           | Cells/ $\mu$ l           | Monocytes                                             | CD33+                                       | % of Mononuclear cells (MNCs) |                                            |                 |
|                                  | Mononuclear cells (CD45+SSCmed/lo)  | Cells/ $\mu$ l           |                                                       | CD14+                                       | % of CD33+                    |                                            |                 |
|                                  | Lymphocytes (CD14-)                 | Cells/ $\mu$ l           |                                                       | CD33+CD14-HLA-DR-                           | % of CD33+                    |                                            |                 |
|                                  | Monocytes (CD14+)                   | Cells/ $\mu$ l           |                                                       | CD33+CD14-HLA-DR- PD-L1 PC7 Arithmetic Mean | MFI                           |                                            |                 |
|                                  | CD3+ T cells                        | Cells/ $\mu$ l           |                                                       | CD14+HLA-DRlo/neg                           | % of CD14+                    |                                            |                 |
|                                  | CD19+ B cells                       | Cells/ $\mu$ l           |                                                       | CD14+ HLA-DR PacBlu Geometric Mean          | MFI                           |                                            |                 |
|                                  | CD16+CD56- NK cells                 | Cells/ $\mu$ l           |                                                       | CD14+CD86+                                  | % of CD14+                    |                                            |                 |
|                                  | CD56+CD16+ NK cells                 | Cells/ $\mu$ l           |                                                       | CD14+CD40+                                  | % of CD14+                    |                                            |                 |
|                                  | CD56b/CD16- NK cells                | Cells/ $\mu$ l           |                                                       | CD14+PD-L1+                                 | % of CD14+                    |                                            |                 |
|                                  | CD3+CD56+CD16+ NKT cells            | Cells/ $\mu$ l           |                                                       | CD14+CD142+                                 | % of CD14+                    |                                            |                 |
|                                  | CD3+CD56+CD16- NKT cells            | Cells/ $\mu$ l           |                                                       | CD14+CD16-                                  | % of CD14+                    |                                            |                 |
|                                  | Lineage neg cells                   | Cells/ $\mu$ l           |                                                       | CD14+CD16- HLA-DR PacBlu Geometric Mean     | MFI                           |                                            |                 |
|                                  | CD4+ T cells                        | Cells/ $\mu$ l           |                                                       | CD14+CD16+                                  | % of CD14+                    |                                            |                 |
|                                  | CD8+ T cells                        | Cells/ $\mu$ l           |                                                       | CD14+CD16+ HLA-DR PacBlu Geometric Mean     | MFI                           |                                            |                 |
|                                  | CD4+CD8+ T cells                    | Cells/ $\mu$ l           |                                                       | CD14loCD16+                                 | % of CD14+                    |                                            |                 |
|                                  | CD4-CD8- T cells                    | Cells/ $\mu$ l           |                                                       | CD14loCD16+ HLA-DR PacBlu Geometric Mean    | MFI                           |                                            |                 |
|                                  | CD4/CD8 ratio                       | Ratio of cell counts     |                                                       | CD14-CD16-                                  | % of CD14+                    |                                            |                 |
|                                  | gamma delta T cells                 | Cells/ $\mu$ l           |                                                       | CD14-CD16- HLA-DR PacBlu Geometric Mean     | MFI                           |                                            |                 |
|                                  | gamma delta T cells                 | % of CD3+                |                                                       | CD14+CD16- CD86 APC Geometric Mean          | MFI                           |                                            |                 |
|                                  | Classical CD14+CD16- Monocytes      | Cells/ $\mu$ l           |                                                       | CD14+CD16+ CD86 APC Geometric Mean          | MFI                           |                                            |                 |
|                                  | Intermediate CD14+CD16+ Monocytes   | Cells/ $\mu$ l           |                                                       | CD14loCD16+ CD86 APC Geometric Mean         | MFI                           |                                            |                 |
|                                  | Non-classical CD14loCD16+ Monocytes | Cells/ $\mu$ l           |                                                       | CD14+CD16- CD40 FITC Geometric Mean         | MFI                           |                                            |                 |
|                                  | Neutrophils CD15+CD16-              | Cells/ $\mu$ l           |                                                       | CD14+CD16+ CD40 FITC Geometric Mean         | MFI                           |                                            |                 |
|                                  | Eosinophils CD15+CD16-              | Cells/ $\mu$ l           |                                                       | CD14loCD16+ CD40 FITC Geometric Mean        | MFI                           |                                            |                 |
|                                  | Eosinophils CD15+CD16-              | % of CD15+               |                                                       |                                             |                               |                                            |                 |
|                                  | T cell-1                            | CD4+CD25+CD127lo Tregs   |                                                       | % of CD4+ T cells                           | Granulocytes                  | Neutrophils CD15+CD16+                     | % of CD15+      |
|                                  |                                     | CD4+CD45RA+              |                                                       | % of CD4+ T cells                           |                               | Eosinophils CD15+CD16-                     | % of CD15+      |
| CD4+CD45RO+                      |                                     | % of CD4+ T cells        | CD203c+ Basophils                                     | % of CD45+                                  |                               |                                            |                 |
| CD4+CD45RO+CD62L+CCR7+ Tcm       |                                     | % of CD4+CD45RO+ T cells | CD203c+CCR3+CD63+                                     | % of CD203c+                                |                               |                                            |                 |
| CD4+CD45RO+CD62L-CCR7- Tem       |                                     | % of CD4+CD45RO+ T cells | CD203c+CCR3-CD63-                                     | % of CD203c+                                |                               |                                            |                 |
| CD4+CD45RA+CD62L+CD27+           |                                     | % of CD4+ T cells        | CD15+CD16-CCR3+CD49d+                                 | % of CD15+CD16-                             |                               |                                            |                 |
| CD4+CD25+                        |                                     | % of CD4+ T cells        | CD15+CD16-CCR3-CD49d-                                 | % of CD15+CD16-                             |                               |                                            |                 |
| CD8+CD45RA+                      |                                     | % of CD8+ T cells        | CD15+CD16-CCR3+CD49d+ CD44 PerCp PC5.5 Geometric Mean | MFI                                         |                               |                                            |                 |
| CD8+CD45RO+                      |                                     | % of CD8+ T cells        | CD15+CD16-CCR3-CD49d- CD44 PerCp PC5.5 Geometric Mean | MFI                                         |                               |                                            |                 |
| CD8+CD45RO+CD62L+CCR7+ Tcm       |                                     | % of CD8+CD45RO+ T cells | CD15+CD16+ CD66b FITC Geometric Mean                  | MFI                                         |                               |                                            |                 |
| CD8+CD45RO+CD62L-CCR7- Tem       |                                     | % of CD8+CD45RO+ T cells | CD15+CD16-CCR3+CD49d+ CD66b FITC Geometric Mean       | MFI                                         |                               |                                            |                 |
| CD8+CD45RA+CD62L+CD27+           |                                     | % of CD8+CD45RA+ T cells | CD15+CD16-CCR3-CD49d- CD66b FITC Geometric Mean       | MFI                                         |                               |                                            |                 |
| CD8+CD45RA+CD62L-CD27- Temra     |                                     | % of CD8+ T cells        | CD15+                                                 | % of MNCs                                   |                               |                                            |                 |
| CD8+CD25+                        |                                     | % of CD8+ T cells        | CD15+ MNCs CD66b FITC Geometric Mean                  | MFI                                         |                               |                                            |                 |
| CD8+CD45RA+CD27+CD62L+CCR7+ Tscm |                                     | % of CD8+CD45RA+CD27+    |                                                       |                                             |                               |                                            |                 |
| Modified T cell-2                |                                     | CD4+CTLA4+               | % of CD4+ T cells                                     | Myeloid                                     |                               | LIN-CD33+HLA-DR- (CD11b++CD16-CD15-CD66b-) | % of MNCs       |
|                                  |                                     | CD4+CTLA4+CD28+          | % of CD4+ T cells                                     |                                             |                               | LIN-DR+ DCs                                | % of MNCs       |
|                                  |                                     | CD4+CD28+                | % of CD4+ T cells                                     |                                             |                               | LIN-DR+CD33+CD11c++CD16+                   | % of LIN-HLADR+ |
|                                  |                                     | CD8+CTLA4+               | % of CD8+ T cells                                     |                                             |                               | LIN-DR+CD33+CD11c++CD16-                   | % of LIN-HLADR+ |
|                                  |                                     | CD8+CTLA4+CD28+          | % of CD8+ T cells                                     |                                             |                               | LIN-DR+CD11c dim                           | % of LIN-HLADR+ |
|                                  | CD8+CD28+                           | % of CD8+ T cells        | LIN-DR+CD11cdimCD123br                                |                                             | % of LIN-HLADR+               |                                            |                 |
|                                  | CD4+PD-1+                           | % of CD4+ T cells        | CD15+                                                 |                                             | % of MNCs                     |                                            |                 |
|                                  | CD8+PD-1+                           | % of CD8+ T cells        | CD15+CD66b+                                           |                                             | % of CD15+ MNCs               |                                            |                 |
|                                  | CD4+CD154+                          | % of CD4+ T cells        | LIN-CD33+HLA-DR- CD66b AA750 Arithmetic Mean          |                                             | MFI                           |                                            |                 |
|                                  | CD8+CD154+                          | % of CD8+ T cells        | CD15+MNCs CD66b AA750 Arithmetic Mean                 |                                             | MFI                           |                                            |                 |
|                                  | CD4+CD56+                           | % of CD4+ T cells        |                                                       |                                             |                               |                                            |                 |
|                                  | CD8+CD56+                           | % of CD8+ T cells        |                                                       |                                             |                               |                                            |                 |
|                                  | CD8+CD45RA+CD56+                    | % of CD8+ T cells        |                                                       |                                             |                               |                                            |                 |
|                                  | B cell                              | CD19+CD21-               | % of CD19+ B cells                                    |                                             |                               |                                            |                 |
|                                  |                                     | CD19+CD21+               | % of CD19+ B cells                                    |                                             |                               |                                            |                 |
| CD19+CD27+                       |                                     | % of CD19+ B cells       |                                                       |                                             |                               |                                            |                 |
| CD19+IgM+                        |                                     | % of CD19+ B cells       |                                                       |                                             |                               |                                            |                 |
| CD19+CD24+IgM- Plasma            |                                     | % of CD19+ B cells       |                                                       |                                             |                               |                                            |                 |
| CD19+CD24+IgM+ Transitional      |                                     | % of CD19+ B cells       |                                                       |                                             |                               |                                            |                 |
| CD19+CD27+IgD+IgM+               |                                     | % of CD19+CD27+ B cells  |                                                       |                                             |                               |                                            |                 |
| CD19+CD27+IgD-IgM+               |                                     | % of CD19+CD27+ B cells  |                                                       |                                             |                               |                                            |                 |
| CD19+CD27+IgD-IgM-               |                                     | % of CD19+CD27+ B cells  |                                                       |                                             |                               |                                            |                 |
